# Supplementary material for: RNA polymerase mutations cause cephalosporin resistance in clinical Neisseria gonorrhoeae isolates
Source: eLife. 2020 Feb 3;9:e51407. doi: 10.7554/eLife.51407 (PMC7012608; doi:10.7554/eLife.51407)
Supplement: Figure 5—source data 1. [file elife-51407-fig5-data1.xlsx]

## Sheet: Sheet1
GCGS0457 data
		replicate 1		replicate 2		replicate 3
Peak	Identity	Area	Percent	Area	Percent	Area	Percent
1	tripeptide	188078755	18.6699	18591650	14.6418	19288205	17.7745
2	pentapeptide + mDAP (cleaved 3-3)	6730954	0.668157	273385	0.215304	264348	0.243603
3	peak 2 isomer	16369042	1.62489	834648	0.657325	802425	0.739452
4	pentapeptide (Gly)	4963425	0.492701	474383	0.373599	506348	0.466611
5	tetrapeptide	240380505	23.8617	30155407	23.7488	26792736	24.6901
6a	dipeptide	48766559	4.84087	8797982	6.92883	9269517	8.54207
6b	tripeptide (OAc)	27459195	2.72577	11902002	9.37339	8667018	7.98685
7	pentapeptide + tripep (cleaved 3-3)	10267280	1.01919	348081	0.27413	364511	0.335905
8	pentapeptide	80370311	7.97806	7332000	5.7743	6871974	6.33268
9	tetrapeptide (OAc)	42772321	4.24585	24344229	19.1722	14808393	13.6463
10	pentapeptide (OAc)	7943976	0.788569	2845769	2.24118	2102109	1.93714
11	tripeptide (–H2O)	142214757	14.1171	11010053	8.67094	10103538	9.31063
12	4-3 tetra-tri or 3-3 tri-tetra	7833335	0.777586	133259	0.104948	166696	0.153614
13	4-3 tetra-tri or 3-3 tri-tetra	5645924	0.56045	299326	0.235733	297491	0.274145
14	4-3 tetra-tetra or 3-3 tri-penta	56096556	5.5685	1577259	1.24217	1781026	1.64125
15a	tetrapeptide (–H2O)	46277561	4.5938	3959356	3.11818	2753095	2.53704
15b	4-3 tetra-penta	15731985	1.56166	505484	0.398093	577127	0.531835
16	pentapeptide (–H2O)	7058072	0.700628	398861	0.314122	375452	0.345987
17	4-3 tetra-tetra or 3-3 tri-penta (OAc)	19484774	1.93418	2380023	1.87438	1910110	1.76021
18	4-3 tetra-tri or 3-3 tri tetra (–H2O)	8556532	0.849375	121533	0.095713	125665	0.115803
19	4-3 tetra-tri or 3-3 tri tetra (–H2O)	3577339	0.355109	102274	0.0805456	86544	0.0797522
20	4-3 tetra-tetra or 3-3 tri-penta (–H20)	5970536	0.592673	195996	0.154356	213758	0.196983
21	4-3 tetra-tetra or 3-3 tri-penta (–H20)	14841879	1.4733	393495	0.309896	388023	0.357572
	total monomers		83.0149		94.3574		93.5699
	total crosslinks		16.9851		5.64259		6.43013
SP316 data (GCGS0457 RpoD E98K)
		replicate_1		replicate_2		replicate_3
Peak	Identity	Area	Percent	Area	Percent	Area	Percent
1	tripeptide	178035367	12.5578	15869810	7.79467	13112392	7.21084
2	pentapeptide + mDAP (cleaved 3-3)	12733043	0.898133	593276	0.291396	492250	0.270701
3	peak 2 isomer	22866130	1.61288	1229769	0.604018	10566456	5.81076
4	pentapeptide (Gly)	13198970	0.930998	2269020	1.11446	2339367	1.28648
5	tetrapeptide	299475206	21.1237	35329750	17.3527	29485321	16.2147
6a	dipeptide	83041774	5.8574	30794411	15.1251	28103432	15.4548
6b	tripeptide (OAc)	27025734	1.90628	10998505	5.40207	7645623	4.20452
7	pentapeptide + tripep (cleaved 3-3)	10189923	0.718753	386413	0.189792	0	0
8	pentapeptide	211439020	14.914	31061088	15.2561	28062651	15.4324
9	tetrapeptide (OAc)	55881478	3.94163	32299015	15.8641	22353281	12.2926
10	pentapeptide (OAc)	24416161	1.72221	10647793	5.22981	8368808	4.60222
11	tripeptide (–H2O)	148215263	10.4545	1760621	0.864753	8270194	4.54799
12	4-3 tetra-tri or 3-3 tri-tetra	8489479	0.598811	324221	0.159246	295652	0.162587
13	4-3 tetra-tri or 3-3 tri-tetra	6608169	0.466111	480461	0.235985	383586	0.210944
14	4-3 tetra-tetra or 3-3 tri-penta	70966719	5.00568	4556292	2.23789	3485777	1.91692
15a	tetrapeptide (–H2O)	94934006	6.69623	7567626	3.71694	5686005	3.12688
15b	4-3 tetra-penta	36266702	2.55809	4707798	2.3123	3963953	2.17988
16	pentapeptide (–H2O)	36241109	2.55629	3183422	1.56358	2643414	1.45368
17	4-3 tetra-tetra or 3-3 tri-penta (OAc)	26189389	1.84728	7153209	3.5134	4712482	2.59151
18	4-3 tetra-tri or 3-3 tri tetra (–H2O)	11856648	0.836316	405128	0.198984	296795	0.163215
19	4-3 tetra-tri or 3-3 tri tetra (–H2O)	4844465	0.341707	232295	0.114095	172872	0.0950667
20	4-3 tetra-tetra or 3-3 tri-penta (–H20)	8513354	0.600495	445494	0.21881	330159	0.181563
21	4-3 tetra-tetra or 3-3 tri-penta (–H20)	26295213	1.85475	1302707	0.639842	1072420	0.589751
	total monomers		82.661		89.2843		85.8271
	total crosslinks		17.339		10.7157		14.1729
SP319 data (GCGS0457 RpoB R201H)
		replicate_1		replicate_2		replicate_3
Peak	Identity	Area	Percent	Area	Percent	Area	Percent
1	tripeptide	201753199	13.1995	5299838	4.02038	3532814	4.86145
2	pentapeptide + mDAP (cleaved 3-3)	13309459	0.870755	508470	0.385718	467195	0.642899
3	peak 2 isomer	28682034	1.87649	941106	0.71391	1369702	1.88482
4	pentapeptide (Gly)	12408653	0.811821	1133139	0.859584	1008376	1.38761
5	tetrapeptide	375976214	24.5978	26959506	20.4511	12370083	17.0223
6a	dipeptide	89866834	5.87943	22883744	17.3593	22155488	30.4878
6b	tripeptide (OAc)	31602284	2.06754	3345218	2.53764	1691716	2.32794
7	pentapeptide + tripep (cleaved 3-3)	11634814	0.761194	201182	0.152614	380677	0.523843
8	pentapeptide	185146888	12.113	19932404	15.1204	9349525	12.8657
9	tetrapeptide (OAc)	81804653	5.35197	24727375	18.7578	9620207	13.2382
10	pentapeptide (OAc)	20252927	1.32502	5771205	4.37796	2233640	3.07368
11	tripeptide (–H2O)	156510300	10.2395	690572	0.523858	2574135	3.54222
12	4-3 tetra-tri or 3-3 tri-tetra	6642554	0.434581	102071	0.0774297	0	0
13	4-3 tetra-tri or 3-3 tri-tetra	7592964	0.49676	204425	0.155074	0	0
14	4-3 tetra-tetra or 3-3 tri-penta	71571653	4.68249	2898128	2.19848	872696	1.2009
15a	tetrapeptide (–H2O)	118990804	7.78483	6113739	4.6378	2107506	2.9001
15b	4-3 tetra-penta	28225097	1.84659	3071137	2.32972	971237	1.3365
16	pentapeptide (–H2O)	22596349	1.47834	1213530	0.920567	711331	0.978851
17	4-3 tetra-tetra or 3-3 tri-penta (OAc)	26160106	1.71149	4631841	3.51365	1072629	1.47603
18	4-3 tetra-tri or 3-3 tri tetra (–H2O)	5735768	0.375256	135021	0.102425	0	0
19	4-3 tetra-tri or 3-3 tri tetra (–H2O)	3963821	0.259328	102560	0.0778006	0	0
20	4-3 tetra-tetra or 3-3 tri-penta (–H20)	7278232	0.476169	177929	0.134975	0	0
21	4-3 tetra-tetra or 3-3 tri-penta (–H20)	20790608	1.3602	780019	0.591712	181050	0.24914
	total monomers		84.8487		89.5665		92.6859
	total crosslinks		15.1513		10.4335		7.31414
